# Supplementary material for: El molesto efecto del eco
Source: Springer Nature journal article supplement (doi:10.1007/s11136-018-1941-1), 1999-01-01
Supplement: MOESM1 [file 15973708]

| **eTable 1. Validation of Propensity Score Matching with Pre-Post Standard Differences and P Values for Opioid vs. Non-opioid Users** | | | | | | | | |
| --- | --- | --- | --- | --- | --- | --- | --- | --- |
|  | **Pre-Match** | | | | **Post-Match** | | | |
|  | **Non-Opioid Users** | **Opioid Users** | **Standard Difference** | **P value** | **Non-Opioid Users** | **Opioid Users** | **Standard Difference** | **P Value** |
| **Race** |  |  |  |  |  |  |  |  |
| White | 0.7570 | 0.7145 | -9.65 | 0.0429 | 0.7761 | 0.7730 | -0.73 | 0.9255 |
| Black | 0.1626 | 0.2246 | 15.76 | 0.0009 | 0.1718 | 0.1534 | -4.99 | 0.5250 |
| Other | 0.0804 | 0.0609 | -7.64 | 0.1170 | 0.0521 | 0.0736 | 8.85 | 0.2595 |
| **Age** |  |  |  |  |  |  |  |  |
| 18-34 | 0.0906 | 0.0942 | 1.24 | 0.7949 | 0.0951 | 0.0736 | -7.73 | 0.3247 |
| 35-49 | 0.1787 | 0.2565 | 18.95 | <0.0001 | 0.2239 | 0.2331 | 2.19 | 0.7800 |
| 50-65 | 0.3946 | 0.4362 | 8.46 | 0.0772 | 0.4233 | 0.4233 | 0.00 | 1.0000 |
| 66-85 | 0.3362 | 0.2130 | -27.85 | <0.0001 | 0.2577 | 0.2699 | 2.78 | 0.7227 |
| **Gender** |  |  |  |  |  |  |  |  |
| Female | 0.6418 | 0.6565 | 3.08 | 0.5213 | 0.6350 | 0.6227 | -2.54 | 0.7462 |
| Male | 0.3582 | 0.3435 | -3.08 | 0.5213 | 0.3650 | 0.3773 | 2.54 | 0.7462 |
| **Marital Status** |  |  |  |  |  |  |  |  |
| Not Married | 0.3099 | 0.3449 | 7.47 | 0.1181 | 0.3313 | 0.3006 | -6.60 | 0.4003 |
| Never Married | 0.1482 | 0.1435 | -1.33 | 0.7815 | 0.1472 | 0.1411 | -1.75 | 0.8239 |
| Married | 0.5419 | 0.5116 | -6.08 | 0.2050 | 0.5215 | 0.5583 | 7.39 | 0.3465 |
| **Educational Level** |  |  |  |  |  |  |  |  |
| More than High School | 0.5250 | 0.4899 | -7.03 | 0.1427 | 0.5184 | 0.5399 | 4.30 | 0.5835 |
| High School or Less | 0.4699 | 0.5000 | 6.02 | 0.2095 | 0.4755 | 0.4540 | -4.31 | 0.5832 |
| Missing | 0.0051 | 0.0101 | 5.83 | 0.2034 | 0.0061 | 0.0061 | 0.00 | 1.0000 |
| **Health Insurance** |  |  |  |  |  |  |  |  |
| Public | 0.3192 | 0.3536 | 7.29 | 0.1275 | 0.3374 | 0.3190 | -3.92 | 0.6174 |
| Private | 0.5859 | 0.5333 | -10.61 | 0.0267 | 0.5583 | 0.5828 | 4.96 | 0.5275 |
| Uninsured | 0.0948 | 0.1130 | 5.97 | 0.2086 | 0.1043 | 0.0982 | -2.03 | 0.7955 |
| **Region** |  |  |  |  |  |  |  |  |
| Northeast | 0.1795 | 0.1522 | -7.35 | 0.1285 | 0.1503 | 0.1779 | 7.46 | 0.3420 |
| Midwest | 0.2566 | 0.2275 | -6.78 | 0.1597 | 0.2546 | 0.2577 | 0.70 | 0.9286 |
| South | 0.3184 | 0.3942 | 15.88 | 0.0009 | 0.3650 | 0.3712 | 1.27 | 0.8712 |
| West | 0.2456 | 0.2261 | -4.59 | 0.3406 | 0.2301 | 0.1933 | -9.02 | 0.2506 |
| **Income Level** |  |  |  |  |  |  |  |  |
| Poor/Near Poor | 0.2083 | 0.3145 | 24.35 | <0.0001 | 0.2669 | 0.2270 | -9.26 | 0.2384 |
| Low Income | 0.1677 | 0.1609 | -1.83 | 0.7031 | 0.1564 | 0.1626 | 1.68 | 0.8309 |
| Middle Income | 0.2870 | 0.2594 | -6.20 | 0.1978 | 0.2362 | 0.2761 | 9.15 | 0.2441 |
| High Income | 0.3370 | 0.2652 | -15.70 | 0.0012 | 0.3405 | 0.3344 | -1.30 | 0.8687 |
| **Charlson Comorbidity Index** | 0.6859 | 0.6884 | 0.55 | 0.9504 | 0.6840 | 0.6902 | 1.32 | 0.9276 |
| **Chronic Back Pain** | 0.4217 | 0.5739 | 30.81 | <0.0001 | 0.4939 | 0.4908 | -0.61 | 0.9377 |
| **Chronic Osteoarthritis** | 0.4310 | 0.3681 | -12.86 | 0.0076 | 0.3834 | 0.3926 | 1.89 | 0.8098 |
| **Chronic Rheumatoid Arthritis** | 0.2066 | 0.1870 | -4.94 | 0.3050 | 0.1963 | 0.2025 | 1.54 | 0.8449 |
| **Drug Exposure in Rounds 2 to 4** |  |  |  |  |  |  |  |  |
| Anti-Depressant Use | 0.2193 | 0.3246 | 23.84 | <0.0001 | 0.2883 | 0.2853 | -0.68 | 0.9311 |
| Anti-Anxiety Use | 0.1135 | 0.1768 | 18.06 | 0.0001 | 0.1534 | 0.1472 | -1.72 | 0.8268 |
| COX-2 Inhibitor Use | 0.0500 | 0.0594 | 4.16 | 0.3802 | 0.0583 | 0.0675 | 3.79 | 0.6290 |
| Skeletal Muscle Relaxant Use | 0.1101 | 0.2841 | 44.82 | <0.0001 | 0.1902 | 0.1902 | 0.00 | 1.0000 |
| NSAID Use | 0.3023 | 0.3899 | 18.49 | 0.0001 | 0.3344 | 0.3374 | 0.65 | 0.9340 |
| **Mental Health (MH) Subdomain, R2✠** |  |  |  |  |  |  |  |  |
| Less than 50 | 0.1363 | 0.2493 | 28.93 | <0.0001 | 0.1933 | 0.1902 | -0.78 | 0.9209 |
| 50 to <62.5 | 0.1702 | 0.1710 | 0.22 | 0.9637 | 0.1442 | 0.1595 | 4.27 | 0.5860 |
| 62.5 to <87.5 | 0.3836 | 0.3855 | 0.40 | 0.9339 | 0.4080 | 0.4080 | 0.00 | 1.0000 |
| Greater than or Equal to 87.5 | 0.3099 | 0.1942 | -26.89 | <0.0001 | 0.2546 | 0.2423 | -2.84 | 0.7175 |
| **Role Emotional (RE) Subdomain, R2✠** |  |  |  |  |  |  |  |  |
| Less than 50 | 0.1084 | 0.2058 | 27.01 | <0.0001 | 0.1135 | 0.1380 | 7.41 | 0.3455 |
| 50 to <75 | 0.2049 | 0.2174 | 3.06 | 0.5224 | 0.2117 | 0.2362 | 5.89 | 0.4531 |
| 75 to <100 | 0.2659 | 0.2609 | -1.14 | 0.8127 | 0.2822 | 0.2546 | -6.23 | 0.4272 |
| 100 | 0.4208 | 0.3159 | -21.87 | <0.0001 | 0.3926 | 0.3712 | -4.42 | 0.5733 |
| **Social Functioning (SF) Subdomain, R2✠** |  |  |  |  |  |  |  |  |
| Less than 50 | 0.1304 | 0.2435 | 29.32 | <0.0001 | 0.2055 | 0.2086 | 0.76 | 0.9231 |
| 50 to <75 | 0.1948 | 0.2551 | 14.49 | 0.0022 | 0.1840 | 0.1963 | 3.13 | 0.6903 |
| 75 to <100 | 0.1964 | 0.1971 | 0.17 | 0.9725 | 0.2117 | 0.2086 | -0.75 | 0.9236 |
| 100 | 0.4784 | 0.3043 | -36.24 | <0.0001 | 0.3988 | 0.3865 | -2.51 | 0.7488 |
| **Vitality (VT) Subdomain, R2✠** |  |  |  |  |  |  |  |  |
| Less than 25 | 0.0771 | 0.1261 | 16.29 | 0.0005 | 0.1012 | 0.1104 | 2.99 | 0.7030 |
| 25 to <50 | 0.1770 | 0.2681 | 22.05 | <0.0001 | 0.2117 | 0.1994 | -3.04 | 0.6988 |
| 50 to <75 | 0.3903 | 0.3449 | -9.43 | 0.0501 | 0.3620 | 0.3712 | 1.91 | 0.8077 |
| Greater than or Equal to 75 | 0.3556 | 0.2609 | -20.63 | <0.0001 | 0.3252 | 0.3190 | -1.31 | 0.8671 |
| **General Health Perceptions (GH) Subdomain, R2✠** |  |  |  |  |  |  |  |  |
| Less than 25 | 0.0576 | 0.1145 | 20.40 | <0.0001 | 0.0798 | 0.0644 | -5.93 | 0.4497 |
| 25 to <50 | 0.2083 | 0.3377 | 29.35 | <0.0001 | 0.2577 | 0.2822 | 5.53 | 0.4811 |
| 50 to <75 | 0.4098 | 0.3377 | -14.95 | 0.0019 | 0.3712 | 0.3773 | 1.27 | 0.8717 |
| Greater than or Equal to 75 | 0.3243 | 0.2101 | -26.01 | <0.0001 | 0.2914 | 0.2761 | -3.40 | 0.6646 |
| **Bodily Pain (BP) Subdomain, R2✠** |  |  |  |  |  |  |  |  |
| Less than 25 | 0.0669 | 0.1928 | 38.12 | <0.0001 | 0.1012 | 0.1258 | 7.74 | 0.3240 |
| 25 to <50 | 0.1888 | 0.3348 | 33.67 | <0.0001 | 0.2301 | 0.2546 | 5.73 | 0.4654 |
| 50 to <75 | 0.2261 | 0.1957 | -7.46 | 0.1222 | 0.2454 | 0.2301 | -3.60 | 0.6461 |
| Greater than or Equal to 75 | 0.5182 | 0.2768 | -50.90 | <0.0001 | 0.4233 | 0.3896 | -6.87 | 0.3812 |
| **Physical Functioning (PF) Subdomain, R2✠** |  |  |  |  |  |  |  |  |
| Less than 25 | 0.1541 | 0.2783 | 30.51 | <0.0001 | 0.1902 | 0.1994 | 2.32 | 0.7672 |
| 25 to <50 | 0.0991 | 0.1609 | 18.46 | <0.0001 | 0.1196 | 0.1380 | 5.50 | 0.4838 |
| 50 to <100 | 0.4098 | 0.3638 | -9.47 | 0.0491 | 0.4264 | 0.3988 | -5.61 | 0.4748 |
| 100 | 0.3370 | 0.1971 | -32.02 | <0.0001 | 0.2638 | 0.2638 | 0.00 | 1.0000 |
| **Mental Component Summary (MCS), R2✠** |  |  |  |  |  |  |  |  |
| Less than 30 | 0.0584 | 0.1145 | 20.05 | <0.0001 | 0.0828 | 0.0828 | 0.00 | 1.0000 |
| 30-39 | 0.1397 | 0.1681 | 7.88 | 0.0972 | 0.1442 | 0.1626 | 5.11 | 0.5151 |
| 40-44 | 0.1041 | 0.1087 | 1.47 | 0.7579 | 0.0859 | 0.1043 | 6.28 | 0.4239 |
| 45-49 | 0.1439 | 0.1348 | -2.65 | 0.5824 | 0.1380 | 0.1196 | -5.50 | 0.4838 |
| 50-54 | 0.1761 | 0.1725 | -0.96 | 0.8408 | 0.1871 | 0.1810 | -1.58 | 0.8401 |
| 55-59 | 0.2185 | 0.1841 | -8.59 | 0.0758 | 0.2178 | 0.2147 | -0.75 | 0.9244 |
| Greater than or Equal to 60 | 0.1592 | 0.1174 | -12.13 | 0.0129 | 0.1442 | 0.1350 | -2.66 | 0.7351 |
| **Physical Component Summary (PCS), R2✠** |  |  |  |  |  |  |  |  |
| Less than 25 | 0.1101 | 0.2507 | 37.21 | <0.0001 | 0.1534 | 0.1595 | 1.69 | 0.8296 |
| 25-34 | 0.1795 | 0.2609 | 19.73 | <0.0001 | 0.2239 | 0.2393 | 3.64 | 0.6431 |
| 35-39 | 0.1397 | 0.1493 | 2.72 | 0.5691 | 0.1442 | 0.1472 | 0.87 | 0.9118 |
| 40-44 | 0.1465 | 0.1029 | -13.22 | 0.0069 | 0.1411 | 0.1166 | -7.33 | 0.3505 |
| 45-49 | 0.1312 | 0.0783 | -17.37 | 0.0004 | 0.1104 | 0.1104 | 0.00 | 1.0000 |
| 50-54 | 0.1693 | 0.0942 | -22.35 | <0.0001 | 0.1350 | 0.1319 | -0.90 | 0.9085 |
| Greater than or Equal to 55 | 0.1236 | 0.0638 | -20.65 | <0.0001 | 0.0920 | 0.0951 | 1.05 | 0.8932 |

**✠R2=Obtained from Round 2 of MEPS**
