# Supplementary material for: El molesto efecto del eco
Source: Springer Nature journal article supplement (doi:10.1007/s11136-018-1941-1), 1999-01-01
Supplement: MOESM2 [file 15973708]

| eTable 2. HRQoL between Opioid Users and Non-Opioid Users with Propensity Score Matching | | | | | | |
| --- | --- | --- | --- | --- | --- | --- |
| Comparison | **LS Means (SE)a** | **95% Confidence Interval** | | **Difference** | | **Adjusted P Valuec** |
| **Estimate, (CI)** | **SE, p-value** |  |
| MCS12 in Round 4 | | | | | | |
| Opioid Useb | 48.53 (0.63) | 47.29 | 49.77 | 0.622,  (-1.16, 2.40) | 0.91,  0.4931 | Unadjusted |
| No Opioid Use | 47.91 (0.65) | 46.64 | 49.17 |
| PCS12 in Round 4 | | | | | | |
| Opioid Useb | 37.29 (0.68) | 35.96 | 38.63 | -2.26,  (-4.16, -0.37) | 0.97,  0.0194 | Unadjusted |
| No Opioid Use | 39.56 (0.69) | 38.21 | 40.90 |
| Vitality (VT) Subdomain in Round 4 | | | | | | |
| Opioid Useb | 47.16 (0.56) | 46.07 | 48.26 | 0.37,  (-1.19, 1.93) | 0.79,  0.6403 | 1.0000 |
| No Opioid Use | 46.79 (0.56) | 45.69 | 47.90 |
| Social Functioning (SF) Subdomain in Round 4 | | | | | | |
| Opioid Useb | 43.25 (0.72) | 41.85 | 44.65 | -1.36,  (-3.36, 0.63) | 1.02,  0.1805 | 0.5415 |
| No Opioid Use | 44.61 (0.72) | 43.20 | 46.02 |
| Role Emotional (RE) Subdomain in Round 4 | | | | | | |
| Opioid Useb | 43.78 (0.71) | 42.39 | 45.18 | 0.46,  (-1.56, 2.48) | 1.03,  0.6525 | 1.0000 |
| No Opioid Use | 43.32 (0.74) | 41.86 | 44.77 |
| Overall Mental Health (MH) Subdomain in Round 4 | | | | | | |
| Opioid Useb | 47.25 (0.63) | 46.01 | 48.48 | -0.21,  (-1.93, 1.52) | 0.88,  0.8151 | 1.0000 |
| No Opioid Use | 47.45 (0.61) | 46.25 | 48.65 |
| Bodily Pain (BP) Subdomain in Round 4 | | | | | | |
| Opioid Useb | 36.53 (0.74) | 35.08 | 37.98 | -2.72,  (-4.72, -0.72) | 1.02,  0.0077 | 0.0077 |
| No Opioid Use | 39.25 (0.70) | 37.87 | 40.63 |
| Physical Functioning (PF) Subdomain in Round 4 | | | | | | |
| Opioid Useb | 39.97 (0.69) | 38.62 | 41.32 | -1.27,  (-3.19, 0.66) | 0.98,  0.1963 | 0.7852 |
| No Opioid Use | 41.24 (0.70) | 39.87 | 42.60 |
| Role Functioning (RF) Subdomain in Round 4 | | | | | | |
| Opioid Useb | 39.57 (0.64) | 38.31 | 40.83 | -1.89,  (-3.71, -0.08) | 0.93,  0.0411 | 0.0822 |
| No Opioid Use | 41.46 (0.67) | 40.15 | 42.77 |
| General Overall Health Perceptions (GH) Subdomain in Round 4 | | | | | | |
| Opioid Useb | 38.35 (0.60) | 37.18 | 39.52 | -0.66,  (-2.33, 1.01) | 0.85,  0.4374 | 1.0000 |
| No Opioid Use | 39.01 (0.61) | 37.81 | 40.20 |

aSE=Standard Error, bMatched to No Opioid Use, cAdjustment via Hochberg’s Method
