# Supplementary material for: El molesto efecto del eco
Source: Springer Nature journal article supplement (doi:10.1007/s11136-018-1941-1), 1999-01-01
Supplement: MOESM3 [file 15973708]

| eTable 3. HRQoL by Months of Opioid Use among Propensity Score Matched Pairs of Opioid Users and Non-Opioid Users | | | | | | |
| --- | --- | --- | --- | --- | --- | --- |
| Comparison | **LS Means (SE)a** | **95% Confidence Interval** | | **Difference** | | **Adjusted P Valuec** |
| **Estimate, (CI)** | **SE, p-value** |  |
| MCS12 in Round 4 | | | | | | |
| No Opioid Use | 47.90 (0.63) | 46.66 | 49.14 | **--** | **--** |  |
| <1 Month of Useb | 50.19 (0.82) | 48.58 | 51.81 | 2.29 (0.26, 4.33) | 1.04, 0.0272 | Unadjusted |
| ≥1 Month of Useb | 46.83 (0.95) | 44.97 | 48.69 | -1.07 (-3.32, 1.18) | 1.15, 0.3511 | Unadjusted |
| PCS12 in Round 4 | | | | | | |
| No Opioid Use | 39.54 (0.65) | 38.26 | 40.83 | -- | -- |  |
| <1 Month of Useb | 40.76 (0.87) | 39.06 | 42.46 | 1.21 (-0.91, 3.33) | 1.08, 0.2618 | Unadjusted |
| ≥1 Month of Useb | 33.77 (0.88) | 32.05 | 35.50 | -5.77 (-7.92, -3.61) | 1.10, <0.0001 | Unadjusted |
| Vitality (VT) Subdomain in Round 4 | | | | | | |
| No Opioid Use | 46.79 (0.56) | 45.70 | 47.88 | **--** | **--** |  |
| <1 Month of Useb | 48.66 (0.73) | 47.22 | 50.10 | 1.87 (0.08, 3.67) | 0.92, 0.0411 | 0.2877 |
| ≥1 Month of Useb | 45.64 (0.79) | 44.09 | 47.19 | -1.15 (-3.05, 0.76) | 0.97, 0.2370 | 1.0000 |
| Social Functioning (SF) Subdomain in Round 4 | | | | | | |
| No Opioid Use | 44.60 (0.70) | 43.24 | 45.97 | **--** | **--** |  |
| <1 Month of Useb | 46.01 (0.86) | 44.31 | 47.70 | 1.41 (-0.76, 3.57) | 1.10, 0.2021 | 1.0000 |
| ≥1 Month of Useb | 40.44 (1.08) | 38.32 | 42.56 | -4.16 (-6.71, -1.62) | 1.30, 0.0014 | 0.0028 |
| Role Emotional (RE) Subdomain in Round 4 | | | | | | |
| No Opioid Use | 43.31 (0.72) | 41.91 | 44.72 | **--** | **--** |  |
| <1 Month of Useb | 46.09 (0.84) | 44.43 | 47.74 | 2.78 (0.63, 4.92) | 1.09, 0.0114 | 0.0456 |
| ≥1 Month of Useb | 41.44 (1.08) | 39.31 | 43.56 | -1.88 (-4.45, 0.70) | 1.31, 0.1529 | 1.0000 |
| Overall Mental Health (MH) Subdomain in Round 4 | | | | | | |
| No Opioid Use | 47.44 (0.60) | 46.27 | 48.62 | **--** | **--** |  |
| <1 Month of Useb | 49.53 (0.79) | 47.98 | 51.09 | 2.09 (0.15, 4.03) | 0.99, 0.0351 | 0.2106 |
| ≥1 Month of Useb | 44.91 (0.93) | 43.08 | 46.74 | -2.53 (-4.72, -0.35) | 1.11, 0.0233 | 0.1165 |
| Bodily Pain (BP) Subdomain in Round 4 | | | | | | |
| No Opioid Use | 39.24 (0.66) | 37.93 | 40.54 | **--** | **--** |  |
| <1 Month of Useb | 40.84 (0.93) | 39.01 | 42.67 | 1.61 (-0.63, 3.84) | 1.14, 0.1582 | 1.0000 |
| ≥1 Month of Useb | 32.14 (0.93) | 30.31 | 33.96 | -7.10 (-9.36, -4.85) | 1.15, <0.0001 | <0.0001 |
| Physical Functioning (PF) Subdomain in Round 4 | | | | | | |
| No Opioid Use | 41.23 (0.67) | 39.92 | 42.54 | **--** | **--** |  |
| <1 Month of Useb | 43.26 (0.87) | 41.55 | 44.96 | 2.03 (-0.12, 4.17) | 1.09, 0.0635 | 0.5715 |
| ≥1 Month of Useb | 36.63 (0.93) | 34.81 | 38.45 | -4.60 (-6.84, -2.35) | 1.14, <0.0001 | <0.0001 |
| Role Functioning (RF) Subdomain in Round 4 | | | | | | |
| No Opioid Use | 41.45 (0.64) | 40.20 | 42.70 | **--** | **--** |  |
| <1 Month of Useb | 42.17 (0.82) | 40.55 | 43.78 | 0.72 (-1.31, 2.74) | 1.09, 0.4888 | 1.0000 |
| ≥1 Month of Useb | 36.94 (0.88) | 35.22 | 38.66 | -4.52 (-6.65, -2.38) | 1.09, <0.0001 | <0.0001 |
| General Overall Health Perceptions (GH) Subdomain in Round 4 | | | | | | |
| No Opioid Use | 39.00 (0.58) | 37.85 | 40.14 | **--** | **--** |  |
| <1 Month of Useb | 40.82 (0.79) | 39.27 | 42.37 | 1.83 (-0.10, 3.75) | 0.98, 0.0626 | 0.5008 |
| ≥1 Month of Useb | 35.83 (0.80) | 34.26 | 37.40 | -3.17 (-5.12, -1.22) | 0.99, 0.0015 | 0.0045 |

aSE=Standard Error, bCompared to No Opioid Use, cAdjustment via Hochberg’s Method
