# Supplementary material for: El molesto efecto del eco
Source: Springer Nature journal article supplement (doi:10.1007/s11136-018-1941-1), 1999-01-01
Supplement: MOESM4 [file 15973708]

| eTable 4. HRQoL by Average Daily Dose in Morphine Milligram Equivalents among Propensity Score Matched Pairs of Opioid Users and Non-Opioid Users | | | | | | |
| --- | --- | --- | --- | --- | --- | --- |
| Comparison | **LS Means (SE)a** | **95% Confidence Interval** | | **Difference** | | **Adjusted P Valued** |
| **Estimate, (CI)** | **SE, p-value** |  |
| MCS12 in Round 4 | | | | | | |
| No Opioid Use | 47.90 (0.63) | 46.66 | 49.14 | **--** | **--** |  |
| 0-20 milligramsb,c | 46.37 (1.04) | 44.33 | 48.42 | -1.53 (-3.92, 0.87) | 1.22, 0.2112 | Unadjusted |
| ≥20 milligramsb,c | 49.82 (0.77) | 48.31 | 51.34 | 1.92 (-0.05, 3.89) | 1.00, 0.0558 | Unadjusted |
| PCS12 in Round 4 | | | | | | |
| No Opioid Use | 39.54 (0.65) | 38.26 | 40.83 | -- | -- |  |
| 0-20 milligramsb,c | 36.71 (1.00) | 34.75 | 38.66 | -2.84 (-5.19, -0.49) | 1.20, 0.0178 | Unadjusted |
| ≥20 milligramsb,c | 37.67 (0.83) | 36.03 | 39.30 | -1.88 (-3.95, 0.20) | 1.06, 0.0761 | Unadjusted |
| Vitality (VT) Subdomain in Round 4 | | | | | | |
| No Opioid Use | 46.79 (0.56) | 45.70 | 47.88 | **--** | **--** |  |
| 0-20 milligramsb,c | 46.01 (0.85) | 44.35 | 47.68 | -0.77 (-2.77, 1.22) | 1.02, 0.4465 | 1.0000 |
| ≥20 milligramsb,c | 47.86 (0.70) | 46.48 | 49.24 | 1.07 (-0.68, 2.83) | 0.89, 0.2303 | 1.0000 |
| Social Functioning (SF) Subdomain in Round 4 | | | | | | |
| No Opioid Use | 44.60 (0.69) | 43.24 | 45.97 | **--** | **--** |  |
| 0-20 milligramsb,c | 41.65 (1.15) | 39.39 | 43.90 | -2.96 (-5.60, -0.32) | 1.35, 0.0283 | 0.0849 |
| ≥20 milligramsb,c | 44.22 (0.88) | 42.49 | 45.96 | -0.38 (-2.59, 1.83) | 1.13, 0.7354 | 1.0000 |
| Role Emotional (RE) Subdomain in Round 4 | | | | | | |
| No Opioid Use | 43.31 (0.72) | 41.91 | 44.71 | **--** | **--** |  |
| 0-20 milligramsb,c | 41.97 (1.15) | 39.71 | 44.22 | -1.34 (-3.99, 1.31) | 1.35, 0.3207 | 1.0000 |
| ≥20 milligramsb,c | 44.88 (0.86) | 43.19 | 46.56 | 1.57 (-0.63, 3.77) | 1.12, 0.1627 | 1.0000 |
| Overall Mental Health (MH) Subdomain in Round 4 | | | | | | |
| No Opioid Use | 47.44 (0.60) | 46.27 | 48.62 | **--** | **--** |  |
| 0-20 milligramsb,c | 45.06 (1.00) | 43.09 | 47.03 | -2.39 (-4.68, -0.09) | 1.17, 0.0417 | 0.2085 |
| ≥20 milligramsb,c | 48.56 (0.77) | 47.05 | 50.08 | 1.12 (-0.81, 3.04) | 0.98, 0.2542 | 1.0000 |
| Bodily Pain (BP) Subdomain in Round 4 | | | | | | |
| No Opioid Use | 39.24 (0.66) | 37.93 | 40.54 | **--** | **--** |  |
| 0-20 milligramsb,c | 35.69 (1.08) | 33.56 | 37.82 | -3.55 (-6.05, -1.05) | 1.27, 0.0055 | 0.0055 |
| ≥20 milligramsb,c | 37.05 (0.90) | 35.28 | 38.82 | -2.19 (-4.38, 0.002) | 1.12, 0.0503 | 0.3018 |
| Physical Functioning (PF) Subdomain in Round 4 | | | | | | |
| No Opioid Use | 41.23 (0.67) | 39.92 | 42.54 | **--** | **--** |  |
| 0-20 milligramsb,c | 39.37 (1.06) | 37.29 | 41.45 | -1.86 (-4.31, 0.60) | 1.25, 0.1386 | 0.9702 |
| ≥20 milligramsb,c | 40.35 (0.84) | 38.71 | 41.99 | -0.88 (-2.98, 1.22) | 1.07, 0.4123 | 1.0000 |
| Role Functioning (RF) Subdomain in Round 4 | | | | | | |
| No Opioid Use | 41.45 (0.64) | 40.20 | 42.70 | **--** | **--** |  |
| 0-20 milligramsb,c | 38.36 (0.95) | 36.49 | 40.23 | -3.09 (-5.34, -0.84) | 1.15, 0.0072 | 0.0144 |
| ≥20 milligramsb,c | 40.31 (0.79) | 38.75 | 41.87 | -1.14 (-3.13, 0.86) | 1.02, 0.2624 | 1.0000 |
| General Overall Health Perceptions (GH) Subdomain in Round 4 | | | | | | |
| No Opioid Use | 39.00 (0.58) | 37.85 | 40.14 | **--** | **--** |  |
| 0-20 milligramsb,c | 36.69 (0.93) | 34.87 | 38.51 | -2.31 (-4.46, -0.16) | 1.10, 0.0354 | 0.1416 |
| ≥20 milligramsb,c | 39.35 (0.73) | 37.92 | 40.79 | 0.36 (-1.48, 2.19) | 0.93, 0.7026 | 1.0000 |

aSE=Standard Error, bCompared to No Opioid Use, cAverage Daily Dose in milligrams of morphine equivalents,  dAdjustment via Hochberg’s Method
